# Supplementary material
Source: ML conference proceedings conference paper supplement (https://openreview.net/forum?id=TWIlQMevJx)
Supplement: supplementary_material [file attachment]

See the anonymous code at <https://anonymous.4open.science/r/GTAlign-527C/README.md>
